# Supplementary material for: Association between lifestyle at different life periods and brain integrity in older adults
Source: bioRxiv or medRxiv preprint supplement (doi:10.1101/2024.01.31.24302049), 2024-01-31
Supplement: Supplementary file [file media-1.pdf]

## **Supplementary Material**

### **Association between lifestyle at different life periods and brain integrity in older adults**

Anne-Laure Turpin, Francesca Felisatti, Florence Mézenge, Brigitte Landeau, Denis Vivien,  
Vincent de la Sayette, Gaël Chételat and Julie Gonneaud

for the Medit-Ageing Research Group

This document contains:

- The Medit-Ageing research Group list
- Supplementary Figure and tables

## Collaborators - Medit-Ageing Research Group

| Name                           | Location                                                                | Role                             | Contribution                                                                                     |
|--------------------------------|-------------------------------------------------------------------------|----------------------------------|--------------------------------------------------------------------------------------------------|
| Allais Florence, BA            | EUCLID/F-CRIN Clinical Trials Platform, Bordeaux, France                | Data manager                     | Data management                                                                                  |
| André Claire, PhD              | Institut National de la Santé et de la Recherche Médicale, Caen, France | PhD student                      | Acquisition, analysis, or interpretation of data                                                 |
| Arenaza Urquijo Eider, PhD     | Institut National de la Santé et de la Recherche Médicale, Caen, France | Postdoctoral researcher          | Study design; acquisition, analysis, or interpretation of data                                   |
| Baez Lugo Sebastian, MSc       | University of Geneva, Geneva, Switzerland                               | PhD student                      | Acquisition, analysis, or interpretation of data                                                 |
| Bejanin Alexandre, PhD         | Institut National de la Santé et de la Recherche Médicale, Caen, France | Postdoctoral researcher          | Acquisition, analysis, or interpretation of data                                                 |
| Botton Maelle, MSc             | Institut National de la Santé et de la Recherche Médicale, Caen, France | Neuropsychologist                | Acquisition, analysis, or interpretation of data                                                 |
| Champetier Pierre, PhD         | Institut National de la Santé et de la Recherche Médicale, Caen, France | PhD student                      | Acquisition, analysis, or interpretation of data                                                 |
| Chauveau Léa, MSc              | Institut National de la Santé et de la Recherche Médicale, Caen, France | PhD student                      | Acquisition, analysis, or interpretation of data                                                 |
| Chételat Gaël, PhD             | Institut National de la Santé et de la Recherche Médicale, Caen, France | Coordinator, Work Package Leader | Obtained funding, study design                                                                   |
| Chocat Anne, MD                | Institut National de la Santé et de la Recherche Médicale, Caen, France | Neurologist                      | Investigating doctor                                                                             |
| Collette Fabienne, PhD         | University of Liege, Liege, Belgium                                     | Group leader                     | Obtained funding, study design                                                                   |
| Dautricourt Sophie, MD, PhD    | Institut National de la Santé et de la Recherche Médicale, Caen, France | PhD student                      | Acquisition, analysis, or interpretation of data                                                 |
| de Flores Robin, PhD           | Institut National de la Santé et de la Recherche Médicale, Caen, France | Postdoctoral researcher          | Acquisition, analysis, or interpretation of data; administrative, technical, or material support |
| de la Sayette Vincent, MD, PhD | Centre Hospitalier Universitaire de Caen, Caen, France                  | Neurologist                      | Principal Investigating doctor                                                                   |
| Delarue Marion, MSc            | Institut National de la Santé et de la Recherche Médicale, Caen, France | Neuropsychologist                | Acquisition, analysis, or interpretation of data                                                 |
| Demnitz-King Harriet, MSc      | University College London, United Kingdom                               | PhD student                      | Acquisition, analysis, or interpretation of data                                                 |
| Egret Stéphanie, MSc           | Institut National de la Santé et de la Recherche Médicale, Caen, France | Neuropsychologist                | Acquisition, analysis, or interpretation of data                                                 |
| El Sadawy Rawda, MSc           | Institut National de la Santé et de la Recherche Médicale, Caen, France | Neuropsychologist                | Acquisition, analysis, or interpretation of data                                                 |

|                                    |                                                                          |                                   |                                                                                                  |
|------------------------------------|--------------------------------------------------------------------------|-----------------------------------|--------------------------------------------------------------------------------------------------|
| Esp rou H l ne, MD                 | Institut National de la Sant  et de la Recherche M dicale, Paris, France | Group leader                      | Sponsor                                                                                          |
| Fauvel S verine, BA                | Institut National de la Sant  et de la Recherche M dicale, Caen, France  | Technician                        | Acquisition, analysis, or interpretation of data                                                 |
| Felisatti Francesca, MSc           | Institut National de la Sant  et de la Recherche M dicale, Caen, France  | PhD student                       | Acquisition, analysis, or interpretation of data                                                 |
| Ferment Victor, MSc                | Institut National de la Sant  et de la Recherche M dicale, Caen, France  | Technician                        | Acquisition, analysis, or interpretation of data                                                 |
| Ferrand Devouge Eglantine, MD, MSc | Institut National de la Sant  et de la Recherche M dicale, Caen, France  | Neurologist                       | Investigating doctor                                                                             |
| Frison Eric, MD, PhD               | EUCLID/F-CRIN Clinical Trials, Platform, Bordeaux, France                | Methodologist                     | Acquisition, analysis, or interpretation of data                                                 |
| Gonneaud Julie, PhD                | Institut National de la Sant  et de la Recherche M dicale, Caen, France  | Group leader                      | Obtained funding, study design                                                                   |
| Hamel Ana s, MSc                   | Institut National de la Sant  et de la Recherche M dicale, Caen, France  | PhD student                       | Acquisition, analysis, or interpretation of data                                                 |
| Haudry Sacha, MSc                  | Institut National de la Sant  et de la Recherche M dicale, Caen, France  | PhD student                       | Acquisition, analysis, or interpretation of data                                                 |
| H bert Oriane, MSc                 | Institut National de la Sant  et de la Recherche M dicale, Caen, France  | Neuropsychologist                 | Acquisition, analysis, or interpretation of data                                                 |
| Heidmann Marc, MSc                 | Institut National de la Sant  et de la Recherche M dicale, Lyon, France  | PhD student                       | Acquisition, analysis, or interpretation of data                                                 |
| Kuhn Elizabeth, PhD                | Institut National de la Sant  et de la Recherche M dicale, Caen, France  | PhD student                       | Acquisition, analysis, or interpretation of data                                                 |
| Klimecki Olga, PhD                 | University of Geneva, Geneva, Switzerland                                | Group leader                      | Obtained funding; study design                                                                   |
| Landeau Brigitte, MSc              | Institut National de la Sant  et de la Recherche M dicale, Caen, France  | Neuroimaging developer (engineer) | Acquisition, analysis, or interpretation of data                                                 |
| Ledu Gwendoline, MSc               | Institut National de la Sant  et de la Recherche M dicale, Caen, France  | Clinical research assistant       | Acquisition, analysis, or interpretation of data; administrative, technical, or material support |
| Lefranc Val rie, BA                | Institut National de la Sant  et de la Recherche M dicale, Caen, France  | Clinical research assistant       | Acquisition, analysis, or interpretation of data; Administrative, technical, or material support |
| Lutz Antoine, PhD                  | Institut National de la Sant  et de la Recherche M dicale, Lyon, France  | Group leader                      | Obtained funding; study design                                                                   |
| Marchant Natalie, PhD              | University College London, United Kingdom                                | Group leader                      | Obtained funding; study design                                                                   |
| Mezenge Florence, BA               | Institut National de la Sant  et de la Recherche M dicale, Caen, France  | Neuroimaging engineer assistant   | Acquisition, analysis, or interpretation of data                                                 |

|                         |                                                                         |                   |                                                  |
|-------------------------|-------------------------------------------------------------------------|-------------------|--------------------------------------------------|
| Moulinet Inès, PhD      | Institut National de la Santé et de la Recherche Médicale, Caen, France | PhD student       | Acquisition, analysis, or interpretation of data |
| Ourry Valentin, PhD     | Institut National de la Santé et de la Recherche Médicale, Caen, France | PhD student       | Acquisition, analysis, or interpretation of data |
| Palix Cassandre, MSc    | Institut National de la Santé et de la Recherche Médicale, Caen, France | PhD student       | Acquisition, analysis, or interpretation of data |
| Paly Léo, MSc           | Institut National de la Santé et de la Recherche Médicale, Caen, France | Neuropsychologist | Acquisition, analysis, or interpretation of data |
| Poisnel Géraldine, PhD  | Institut National de la Santé et de la Recherche Médicale, Caen, France | Group leader      | Obtained funding; study design                   |
| Quillard Anne, MD       | Institut National de la Santé et de la Recherche Médicale, Caen, France | Neurologist       | Investigating doctor                             |
| Rauchs Géraldine, PhD   | Institut National de la Santé et de la Recherche Médicale, Caen, France | Researcher        | Study design                                     |
| Rehel Stéphane, PhD     | Institut National de la Santé et de la Recherche Médicale, Caen, France | PhD student       | Acquisition, analysis, or interpretation of data |
| Requier Florence, MSc   | University of Liege, Liege, Belgium                                     | PhD student       | Acquisition, analysis, or interpretation of data |
| Salmon Eric, MD, PhD    | University of Liege, Liege, Belgium                                     | Group leader      | Obtained funding; study design                   |
| Smith Rhonda, MSc       | Minerva Health & Care Communications Ltd, Andover, United Kingdom       | Group leader      | Communication, dissemination                     |
| Tomadesso Clémence, PhD | Institut National de la Santé et de la Recherche Médicale, Caen, France | PhD student       | Acquisition, analysis, or interpretation of data |
| Touron Edelweiss, PhD   | Institut National de la Santé et de la Recherche Médicale, Caen, France | PhD student       | Acquisition, analysis, or interpretation of data |
| Turpin Anne-Laure, MSc  | Institut National de la Santé et de la Recherche Médicale, Caen, France | PhD student       | Acquisition, analysis, or interpretation of data |
| Vuilleumier Patrik, MD  | University of Geneva, Geneva, Switzerland                               | Group leader      | Obtained funding; study design                   |
| Whitfield Tim, PhD      | University College London, United Kingdom                               | PhD student       | Acquisition, analysis, or interpretation of data |
| Wirth Miranka, PhD      | Deutsches Zentrum für Neurodegenerative Erkrankungen, Dresden, Germany  | Group leader      | Study design                                     |

**Supplementary Figure 1:** Flow chart

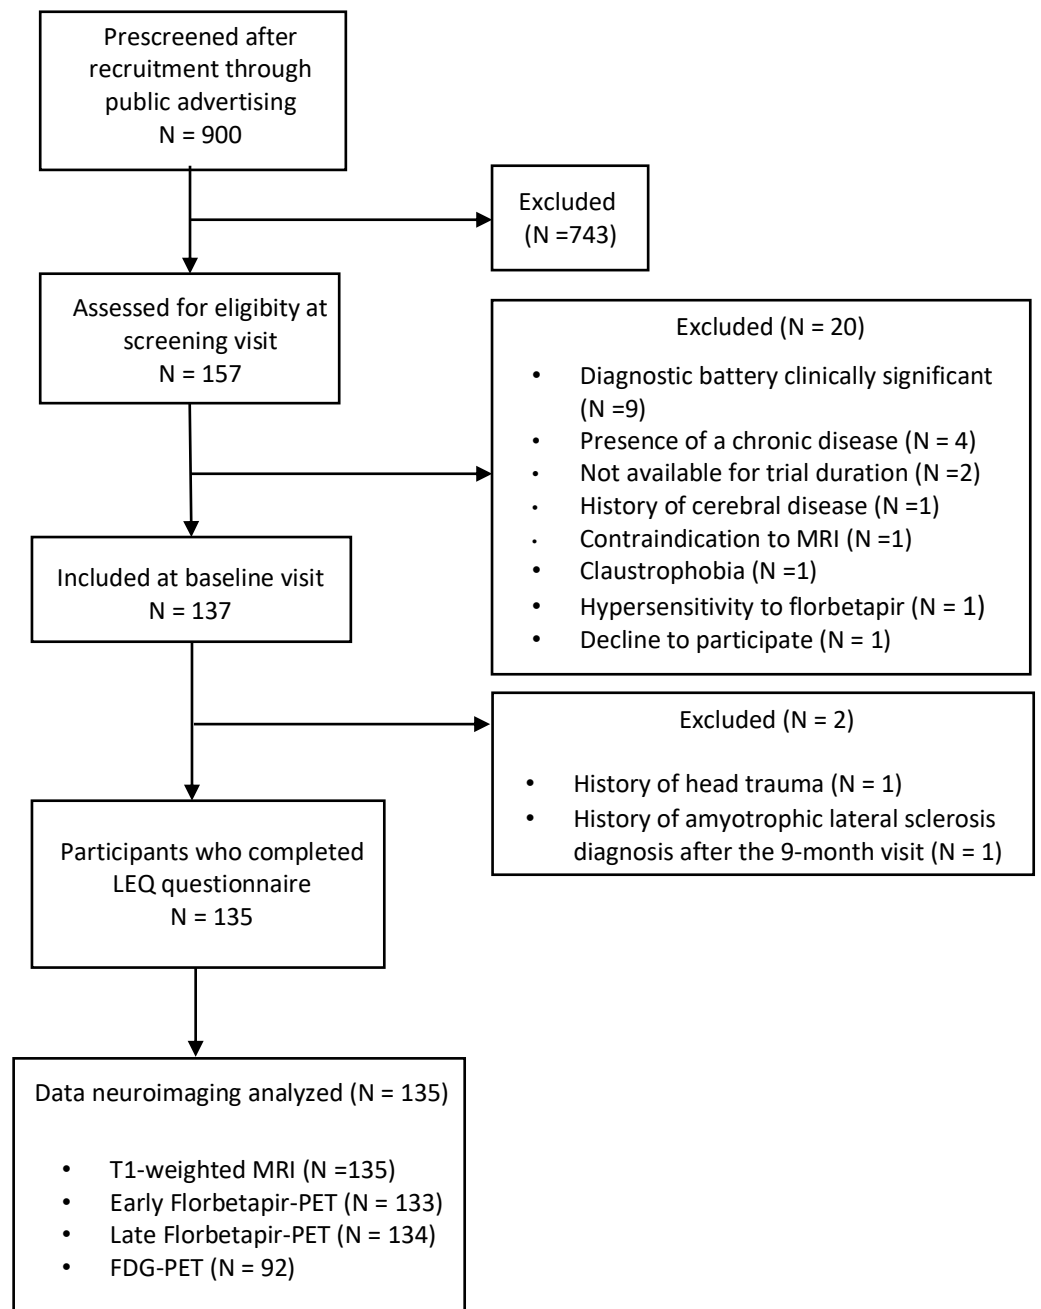

**Supplementary Table 1:** Correlation coefficient comparisons of the association between lifestyle at each life periods and (a) gray matter volume and (b) amyloid burden

**a) Gray Matter volume (GMv)**

|                                       | GMv ~ LEQ-Midlife                       | GMv ~ LEQ-Midlife                       | GMv ~ LEQ-Late                   |
|---------------------------------------|-----------------------------------------|-----------------------------------------|----------------------------------|
|                                       | vs                                      | vs                                      | vs                               |
|                                       | GMv ~ LEQ-Late                          | GMv ~ LEQ-Young                         | GMv ~ LEQ-Young                  |
| Pearson and Filon's z (1898)          | z = 3.7834, p = <b>0.0001</b>           | z = 5.0082, p = <b>0.0000</b>           | z = 0.9298, p = 0.1762           |
| Hotelling's t(1940)                   | t = 3.8162, df = 132, p = <b>0.0001</b> | t = 5.1244, df = 132, p = <b>0.0000</b> | t = 0.9204, df = 132, p = 0.1795 |
| William's t (1959)                    | t = 3.8134, df = 132, p = <b>0.0001</b> | t = 5.1229, df = 132, p = <b>0.0000</b> | t = 0.9198, df = 132, p = 0.1797 |
| Olkin's z (1967)                      | z = 3.7834, p = <b>0.0001</b>           | z = 5.0082, p = <b>0.0000</b>           | z = 0.9298, p = 0.1762           |
| Dunn and Clark's z (1969)             | z = 3.6868, p = <b>0.0001</b>           | z = 4.8192, p = <b>0.0000</b>           | z = 0.9298, p = 0.1762           |
| Stanley and Hills' (1970)             | t = 3.8162, df = 132, p = <b>0.0001</b> | t = 5.1243, df = 132, p = <b>0.0000</b> | t = 0.9204, df = 132, p = 0.1795 |
| Meng, Rosenthal, and Rubin's z (1992) | z = 3.6181, p = <b>0.0001</b>           | z = 4.6734, p = <b>0.0000</b>           | z = 0.9168, p = 0.1796           |
| Hittner, May, Silver's (2003)         | z = 3.6517, p = <b>0.0001</b>           | z = 4.7478, p = <b>0.0000</b>           | z = 0.9175, p = 0.1794           |
| Zou's (2007) confidence interval      | 0.1492 0.4808                           | 0.2448 0.5682                           | -0.1048 0.2876                   |

**b) Amyloid burden**

|                                       | Amyloid burden ~ LEQ-Midlife      | Amyloid burden ~ LEQ-Midlife             | Amyloid burden ~ LEQ-Late               |
|---------------------------------------|-----------------------------------|------------------------------------------|-----------------------------------------|
|                                       | vs                                | vs                                       | vs                                      |
|                                       | Amyloid burden ~ LEQ-Late         | Amyloid burden ~ LEQ-Young               | Amyloid burden ~ LEQ-Young              |
| Pearson and Filon's z (1898)          | z = -0.9725, p = 0.8346           | z = -4.0523, p = <b>0.0000</b>           | z = -2.6338, p = <b>0.0042</b>          |
| Hotelling's t(1940)                   | t = -0.9662, df = 131, p = 0.8321 | t = -4.1019, df = 131, p = <b>0.0000</b> | t = -2.6147, df = 131, p = <b>0.005</b> |
| William's t (1959)                    | t = -0.9633, df = 131, p = 0.8314 | t = -4.0988, df = 131, p = <b>0.0000</b> | t = -2.6132, df = 131, p = <b>0.005</b> |
| Olkin's z (1967)                      | z = -0.9725, p = 0.8346           | z = -4.0523, p = <b>0.0000</b>           | z = -2.6338, p = <b>0.0042</b>          |
| Dunn and Clark's z (1969)             | z = -0.9612, p = 0.8318           | z = -3.9408, p = <b>0.0000</b>           | z = -2.5765, p = <b>0.005</b>           |
| Stanley and Hills' (1970)             | t = -0.9662, df = 131, p = 0.8321 | t = -4.1019, df = 131, p = <b>0.0000</b> | t = -2.6147, df = 131, p = <b>0.005</b> |
| Meng, Rosenthal, and Rubin's z (1992) | z = -0.9599, p = 0.8315           | z = -3.8574, p = <b>0.0001</b>           | z = -2.5483, p = <b>0.0054</b>          |
| Hittner, May, Silver's (2003)         | z = -0.9605, p = 0.8316           | z = -3.8983, p = <b>0.0000</b>           | z = -2.5622, p = <b>0.0052</b>          |
| Zou's (2007) confidence interval      | -0.2474 0.0847                    | -0.5011 -0.1709                          | -0.4469 -0.0616                         |

Comparisons of coefficient correlations between life periods for a) GMv and b) amyloid burden were performed on R-Studio. Statistical values were obtained after testing the alternative hypothesis « greater » for GMv and « less » for amyloid burden and were significant when p<0.05.

Abbreviations: LEQ : Lifetime of Experiences Questionnaire ; GMv : Gray Matter volume

**Supplementary Table 2:** Correlation coefficient comparisons of the association between lifestyle at each life periods and (a) cerebral perfusion and (b) glucose metabolism

| <b>a) Cerebral perfusion</b>          |                                         |                                        |                                        |
|---------------------------------------|-----------------------------------------|----------------------------------------|----------------------------------------|
|                                       | Cerebral perfusion ~ LEQ-Late           | Cerebral perfusion ~ LEQ-Late          | Cerebral perfusion ~ LEQ-Young         |
|                                       | vs                                      | vs                                     | vs                                     |
|                                       | Cerebral perfusion ~ LEQ-Midlife        | Cerebral perfusion ~ LEQ-Young         | Cerebral perfusion ~ LEQ-Midlife       |
| Pearson and Filon's z (1898)          | z = 3.5665, <b>p = 0.0002</b>           | z = 2.3046, <b>p= 0.0106</b>           | z = 0.8734, p-value = 0.1912           |
| Hotelling's t(1940)                   | t = 3.5800, df = 130, <b>p = 0.0002</b> | t = 2.2836, df = 130, <b>p = 0.012</b> | t = 0.8650, df = 130, p-value = 0.1943 |
| William's t (1959)                    | t = 3.5800, df = 130, <b>p= 0.0002</b>  | t = 2.2835, df = 130, <b>p = 0.012</b> | t = 0.8644, df = 130, p-value = 0.1945 |
| Olkin's z (1967)                      | z = 3.5665, <b>p= 0.0002</b>            | z = 2.3046, <b>p= 0.0106</b>           | z = 0.8734, p-value = 0.1912           |
| Dunn and Clark's z (1969)             | z = 3.4712, <b>p= 0.0003</b>            | z = 2.2586, <b>p = 0.012</b>           | z = 0.8628, p-value = 0.1941           |
| Stanley and Hills' (1970)             | t = 3.5800, df = 130, <b>p= 0.0002</b>  | t = 2.2836, df = 130, <b>p = 0.012</b> | t = 0.8650, df = 130, p-value = 0.1943 |
| Meng, Rosenthal, and Rubin's z (1992) | z = 3.4128, <b>p= 0.0003</b>            | z = 2.2392, <b>p= 0.0126</b>           | z = 0.8619, p-value = 0.1944           |
| Hittner, May, Silver's (2003)         | z = 3.4425, <b>p = 0.0003</b>           | z = 2.2489, <b>p= 0.0123</b>           | z = 0.8623, p-value = 0.1943           |
| Zou's (2007) confidence interval      | 0.1327 0.4688                           | 0.0301 0.4205                          | -0.0960 0.2462                         |
| <b>b) Glucose metabolism</b>          |                                         |                                        |                                        |
|                                       | Glucose metabolism ~ LEQ-Late           | Glucose metabolism ~ LEQ-Late          | Glucose metabolism ~ LEQ-Midlife       |
|                                       | vs                                      | vs                                     | vs                                     |
|                                       | Glucose metabolism ~ LEQ-Midlife        | Glucose metabolism ~ LEQ-Young         | Glucose metabolism ~ LEQ-Young         |
| Pearson and Filon's z (1898)          | z = 3.2850, <b>p= 0.0005</b>            | z = 1.9051, <b>p= 0.0284</b>           | z = 1.0815, p-value = 0.1397           |
| Hotelling's t(1940)                   | t = 3.2914, df = 89, <b>p= 0.0007</b>   | t = 1.8796, df = 89, <b>p= 0.0317</b>  | t = 1.0664, df = 89, p-value = 0.1446  |
| William's t (1959)                    | t = 3.2913, df = 89, <b>p= 0.0007</b>   | t = 1.8786, df = 89, <b>p= 0.0318</b>  | t = 1.0661, df = 89, p-value = 0.1446  |
| Olkin's z (1967)                      | z = 3.2850, <b>p= 0.0005</b>            | z = 1.9051, <b>p= 0.0284</b>           | z = 1.0815, p-value = 0.1397           |
| Dunn and Clark's z (1969)             | z = 3.1695, <b>p= 0.0008</b>            | z = 1.8584, <b>p= 0.0316</b>           | z = 1.0617, p-value = 0.1442           |
| Stanley and Hills' (1970)             | t = 3.2913, df = 89, <b>p= 0.0007</b>   | t = 1.8796, df = 89, <b>p= 0.0317</b>  | t = 1.0664, df = 89, p-value = 0.1446  |
| Meng, Rosenthal, and Rubin's z (1992) | z = 3.1047, <b>p= 0.0010</b>            | z = 1.8427, <b>p= 0.0327</b>           | z = 1.0592, p-value = 0.1447           |
| Hittner, May, Silver's (2003)         | z = 3.1378, <b>p= 0.0009</b>            | z = 1.8505, <b>p= 0.0321</b>           | z = 1.0605, p-value = 0.1445           |
| Zou's (2007) confidence interval      | 0.1287 0.5335                           | -0.0125 0.4551                         | -0.0934 0.3121                         |

Comparisons of coefficient correlations between life periods for a) cerebral perfusion and b) glucose metabolism were performed on R-studio. Statistical values were obtained and significant when  $p < 0.05$  after testing the alternative hypothesis « greater » for both functional modalities.

Abbreviations: LEQ : Lifetime of Experiences Questionnaire

**Supplementary Table 3:** Correlation coefficient comparisons of the association between LEQ-midlife specific and non-specific scores and (a) gray matter volume and (b) amyloid burden

|                                       | <b>a) Gray Matter volume (GMv)</b><br><b>GMv ~ LEQ-Midlife specific</b> | <b>b) Amyloid burden</b><br><b>Amyloid burden ~ LEQ-Midlife specific</b> |
|---------------------------------------|-------------------------------------------------------------------------|--------------------------------------------------------------------------|
|                                       | vs                                                                      | vs                                                                       |
|                                       | <b>GMv ~ LEQ-Midlife non-specific</b>                                   | <b>Amyloid burden ~ LEQ-Midlife non-specific</b>                         |
| Pearson and Filon's z (1898)          | z = 1.0210, p= 0.1536                                                   | z = -2.0977, p= 0.018                                                    |
| Hottelling's t(1940)                  | t = 1.0154, df = 132, p= 0.1559                                         | t = -2.0898, df = 131, p= 0.0193                                         |
| William's t (1959)                    | t = 1.0104, df = 132, p= 0.1571                                         | t = -2.0809, df = 131, p= 0.0197                                         |
| Olkin's z (1967)                      | z = 1.0210, p= 0.1536                                                   | z = -2.0977, p= 0.018                                                    |
| Dunn and Clark's z (1969)             | z = 1.0083, p= 0.1566                                                   | z = -2.0635, p= 0.0195                                                   |
| Stanley and Hills' (1970)             | t = 1.0154, df = 132, p= 0.1559                                         | t = -2.0898, df = 131, p= 0.0193                                         |
| Meng, Rosenthal, and Rubin's z (1992) | z = 1.0066, p= 0.1571                                                   | z = -2.0490, p= 0.02                                                     |
| Hittner, May, Silver's (2003)         | z = 1.0074, p= 0.1569                                                   | z = -2.0556, p= 0.0199                                                   |
| Zou's (2007) confidence interval      | -0.0962 0.2985                                                          | -0.3985 -0.0102                                                          |

Comparisons of coefficient correlations between specific and non-specific middle adulthood activities for a) GMv and b) amyloid burden were performed on R-studio. Statistical values were obtained after testing the alternative hypothesis « greater » for GMv and « less » for amyloid burden and were significant when  $p < 0.05$ .

Abbreviations: LEQ : Lifetime of Experiences Questionnaire ; GMv : Gray Matter volume



**Supplementary Table 4:** Correlation coefficient comparisons of the association between LEQ-late-life specific and non-specific scores and (a) cerebral perfusion and (b) glucose metabolism

|                                       | <b>a) Cerebral perfusion</b>                    | <b>b) Glucose metabolism</b>                    |
|---------------------------------------|-------------------------------------------------|-------------------------------------------------|
|                                       | <b>Cerebral perfusion ~ LEQ-LL non-specific</b> | <b>Glucose metabolism ~ LEQ-LL specific</b>     |
|                                       | vs                                              | vs                                              |
|                                       | <b>Cerebral perfusion ~ LEQ-LL specific</b>     | <b>Glucose metabolism ~ LEQ-LL non-specific</b> |
| Pearson and Filon's z (1898)          | z = 2.4369, p= 0.0074                           | z = 0.8534, p= 0.1967                           |
| Hotelling's t(1940)                   | t = 2.4212, df = 130, p= 0.0084                 | t = 0.8429, df = 89, p= 0.2008                  |
| William's t (1959)                    | t = 2.4195, df = 130, p= 0.0085                 | t = 0.8403, df = 89, p= 0.2015                  |
| Olkin's z (1967)                      | z = 2.4369, p= 0.0074                           | z = 0.8534, p= 0.1967                           |
| Dunn and Clark's z (1969)             | z = 2.3890, p= 0.0084                           | z = 0.8384, p= 0.2009                           |
| Stanley and Hills' (1970)             | t = 2.4212, df = 130, p= 0.0084                 | t = 0.8429, df = 89, p= 0.2008                  |
| Meng, Rosenthal, and Rubin's z (1992) | z = 2.3670, p= 0.009                            | z = 0.8370, p= 0.2013                           |
| Hittner, May, Silver's (2003)         | z = 2.3778, p= 0.0087                           | z = 0.8377, p= 0.2011                           |
| Zou's (2007) confidence interval      | 0.0415 0.4165                                   | -0.1289 0.3197                                  |

Comparisons of coefficient correlations between specific and non-specific late adulthood activities for a) cerebral perfusion and b) glucose metabolism were performed on R-studio. Statistical values were obtained after testing the alternative hypothesis « greater » for both functional modalities were significant when  $p < 0.05$ .
